# Supplementary material for: Transient downregulation of Bmp signalling induces extra limbs in vertebrates
Source: Oxford University Press journal article supplement (doi:10.1242/dev.078774), 2012-06-07
Supplement: dev078774tables1.pdf [file dev078774tables1.pdf]

**Table S1. Forward and reverse primers used for real-time PCR**

| Gene                | Forward                | Reverse                |
|---------------------|------------------------|------------------------|
| Limb field inducers |                        |                        |
| <i>wnt2ba</i>       | GGTACGACACCACCCGTGTAA  | ATCGAGCCAGTCGGGTTTCT   |
| <i>fgf8a</i>        | ACACGGCTCTGCAGAATGTG   | CCCTTGGGCAACCTCTTCAT   |
| <i>fgf8 b</i>       | ATAGCCGAACCAGCGGTAAA   | TTTTGCCCTCTGATTCGAA    |
| <i>Fgf10</i>        | GCGAGGGATTTTCGGCATT    | GGCGCTCAGACCTACGAACA   |
| <i>fgf24</i>        | AAGGAGACACCCCGATTGAA   | CATGAGGCTGTTTCGCGTTT   |
| <i>sp8</i>          | GCCACTCTGCCTTCAGTACCA  | GACCCCTGTCAACATGGAA    |
| RA modifiers        |                        |                        |
| <i>Aldh1a2</i>      | CCGGCACCGTCTGGATTA     | TTGAATCCTCCGAAAGGACACT |
| <i>Aldh1a3</i>      | GCCGTGCTCGCGACTT       | GAACGCGTGCAGGAAAGGT    |
| <i>crabpI</i>       | GCCGACGACGTGGTTTG      | CCGATTCGCCCTCATTCTC    |
| <i>crabpII</i>      | GACGTCCCTGCACGAGCTT    | TCTGTTTCGAGCTAATCTTGCT |
| <i>Cyp26</i>        | CTTGCCGTTTATTGGAGAAAC  | ATGCGCAGAAACTTCCTTCTCT |
| Normaliser genes    |                        |                        |
| <i>S18</i>          | TCGCTAGTTGGCATCGTTTATG | CGGAGGTTCGAAGACGATCA   |
| <i>SDHA</i>         | TGTCCTATGTGGATCCCGAAA  | AGGGCGGAGTCAGCTTAGGT   |
| <i>HPRT1</i>        | GAAGGCTCTTCTGGATCACGTT | AAGGCATAGCCGACCACAAA   |
